# Supplementary material
Source: ML conference proceedings conference paper supplement (https://openreview.net/forum?id=cLZAl92FtS)

## Sensitivity: Pre-computed

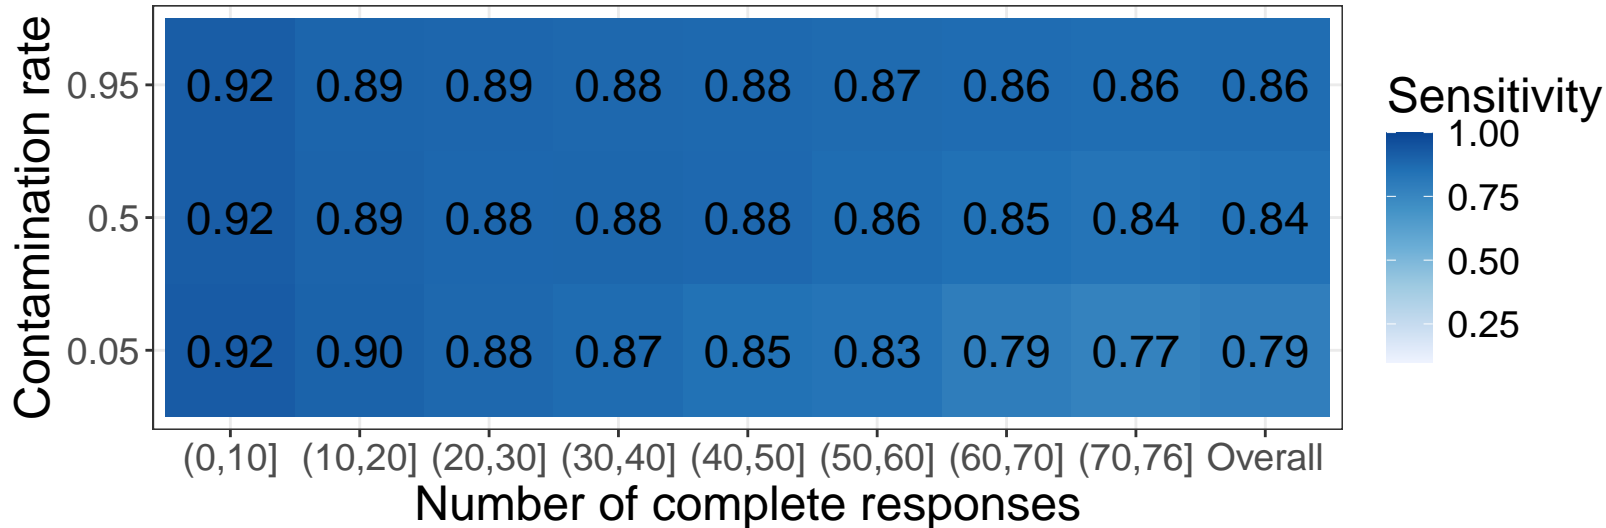

## Sensitivity: LOO

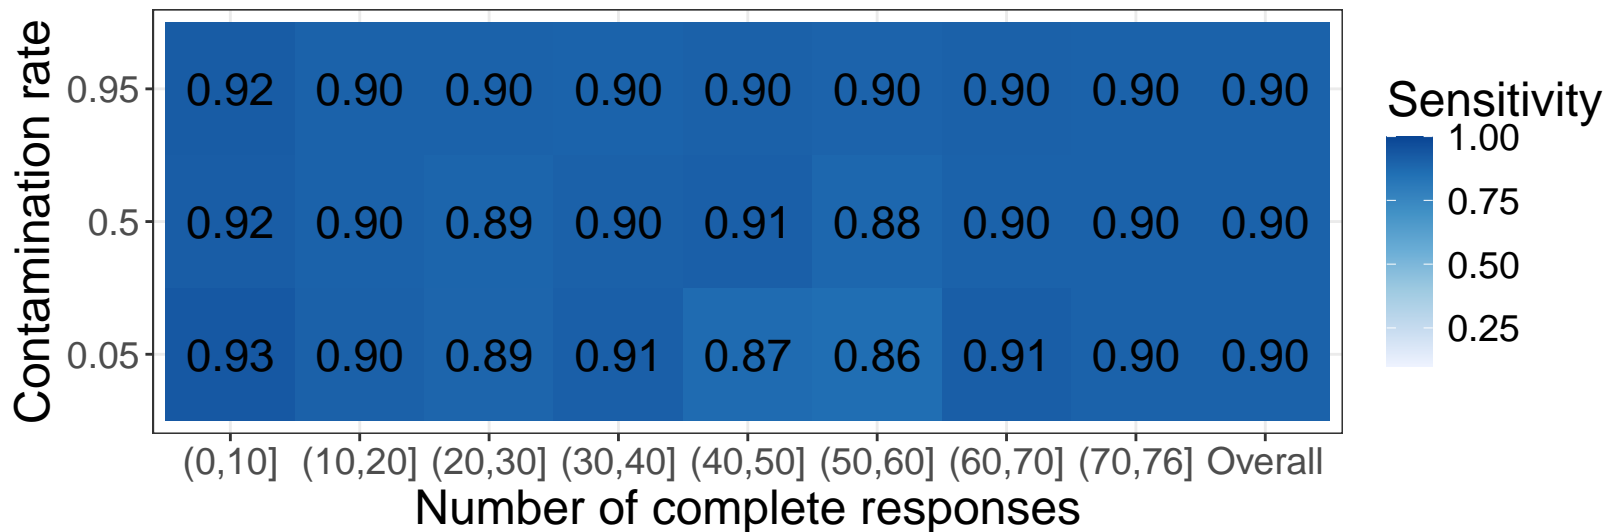

Supplement: supplementary_material [file attachment]

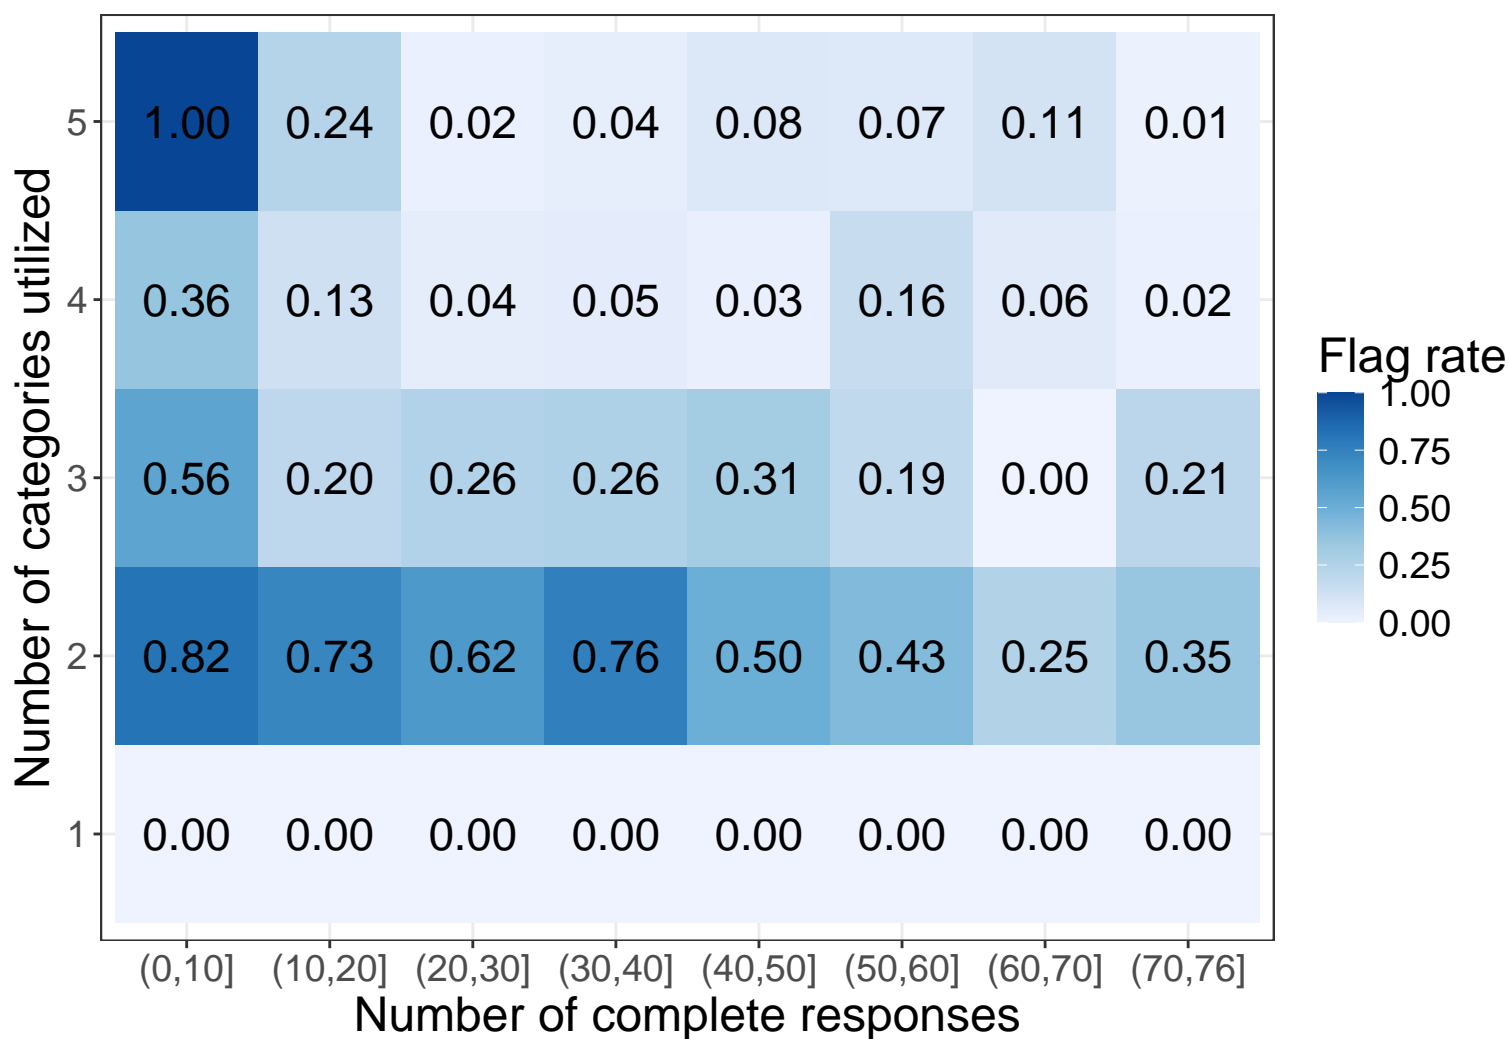

Supplement: supplementary_material [file attachment]

Accuracy: Pre-computed

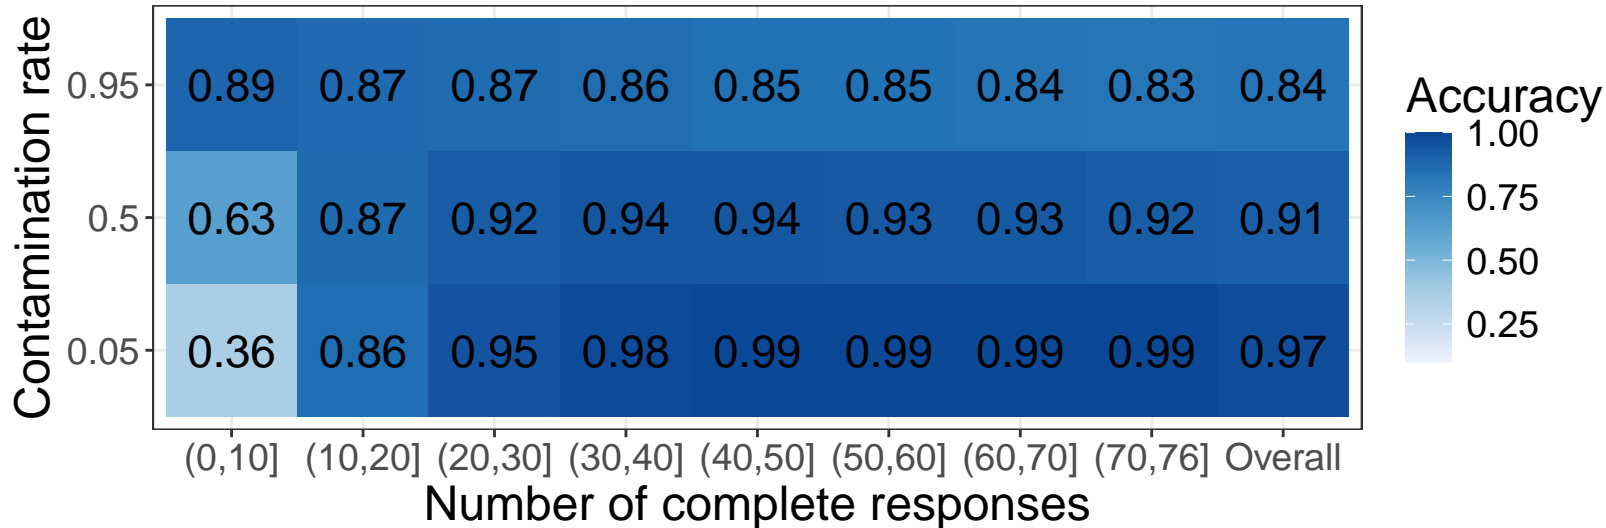

Accuracy: LOO

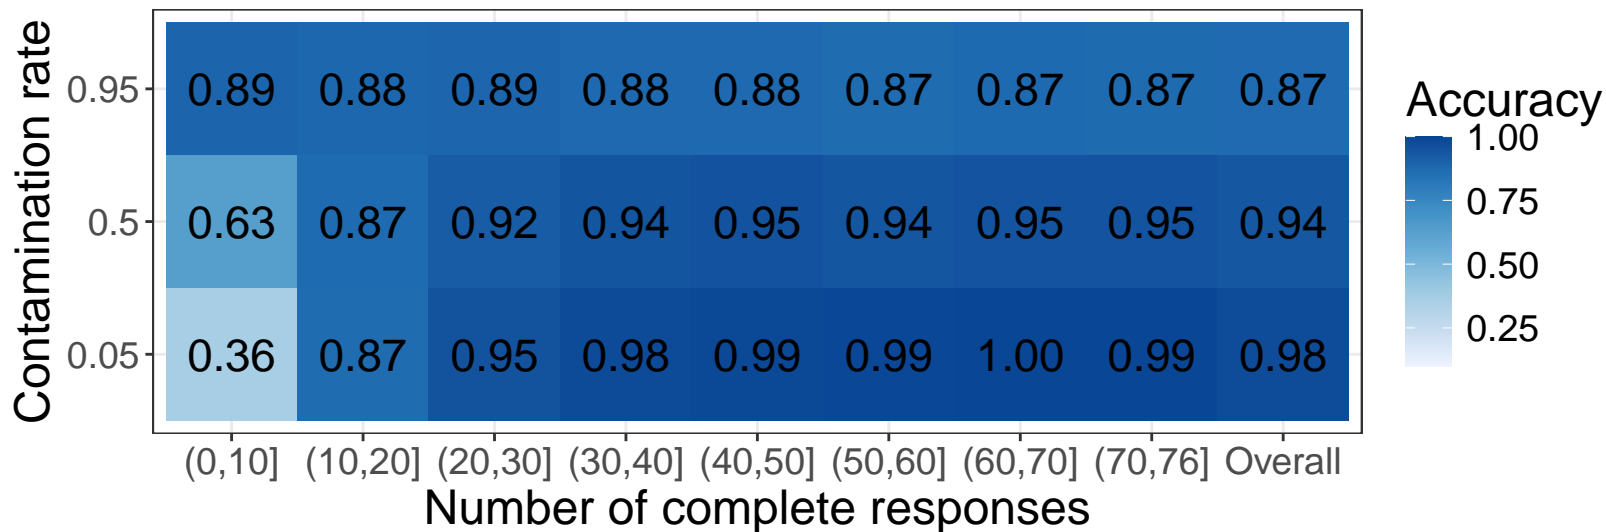

Supplement: supplementary_material [file attachment]

## Specificity: Pre-computed

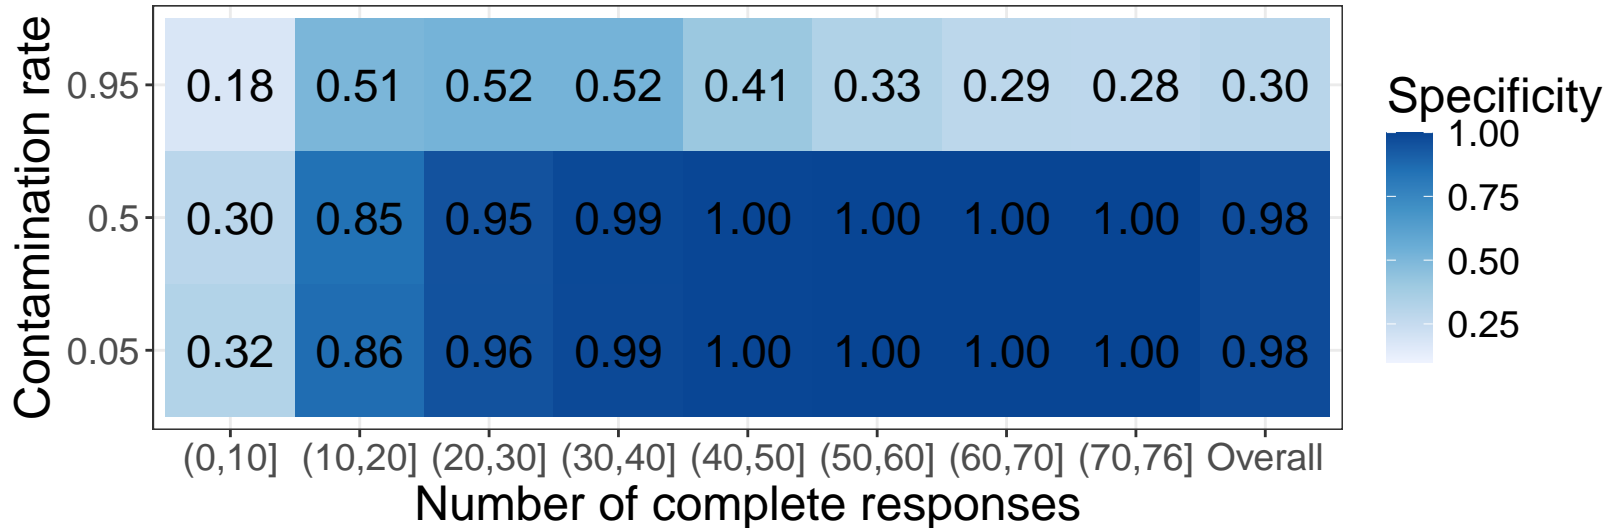

## Specificity: LOO

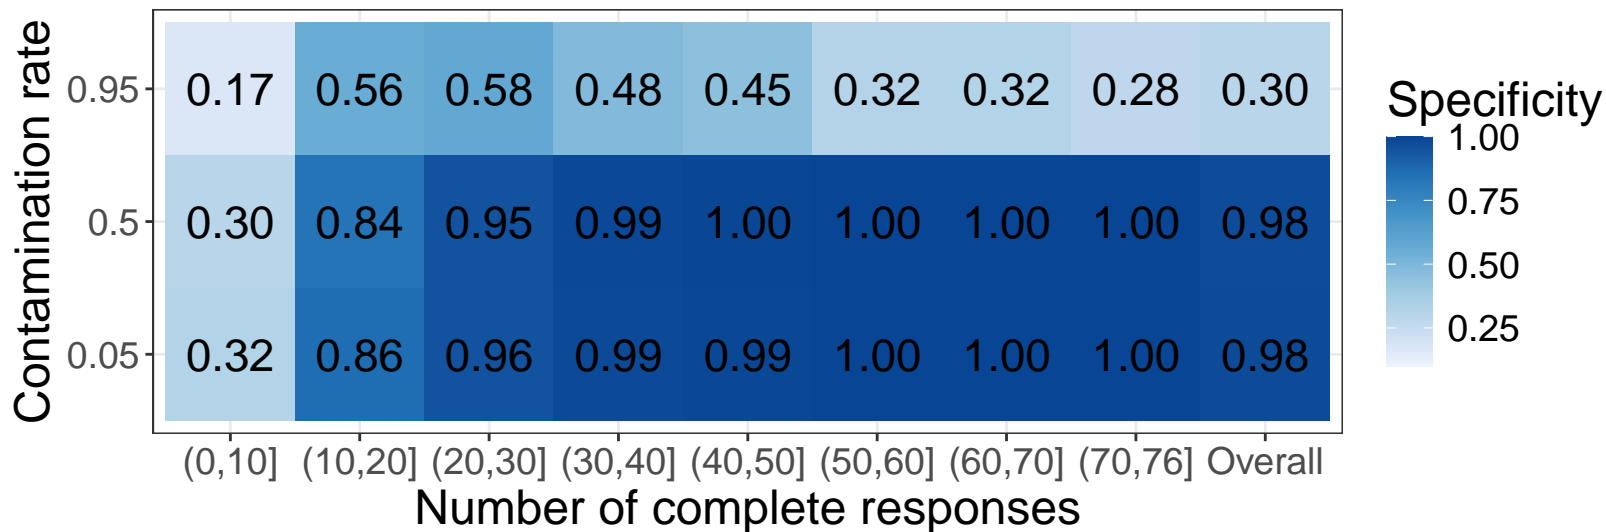

Supplement: supplementary_material [file attachment]

Observations

0

3000

6000

9000

Missing  
(10.1%)

Present  
(89.9%)

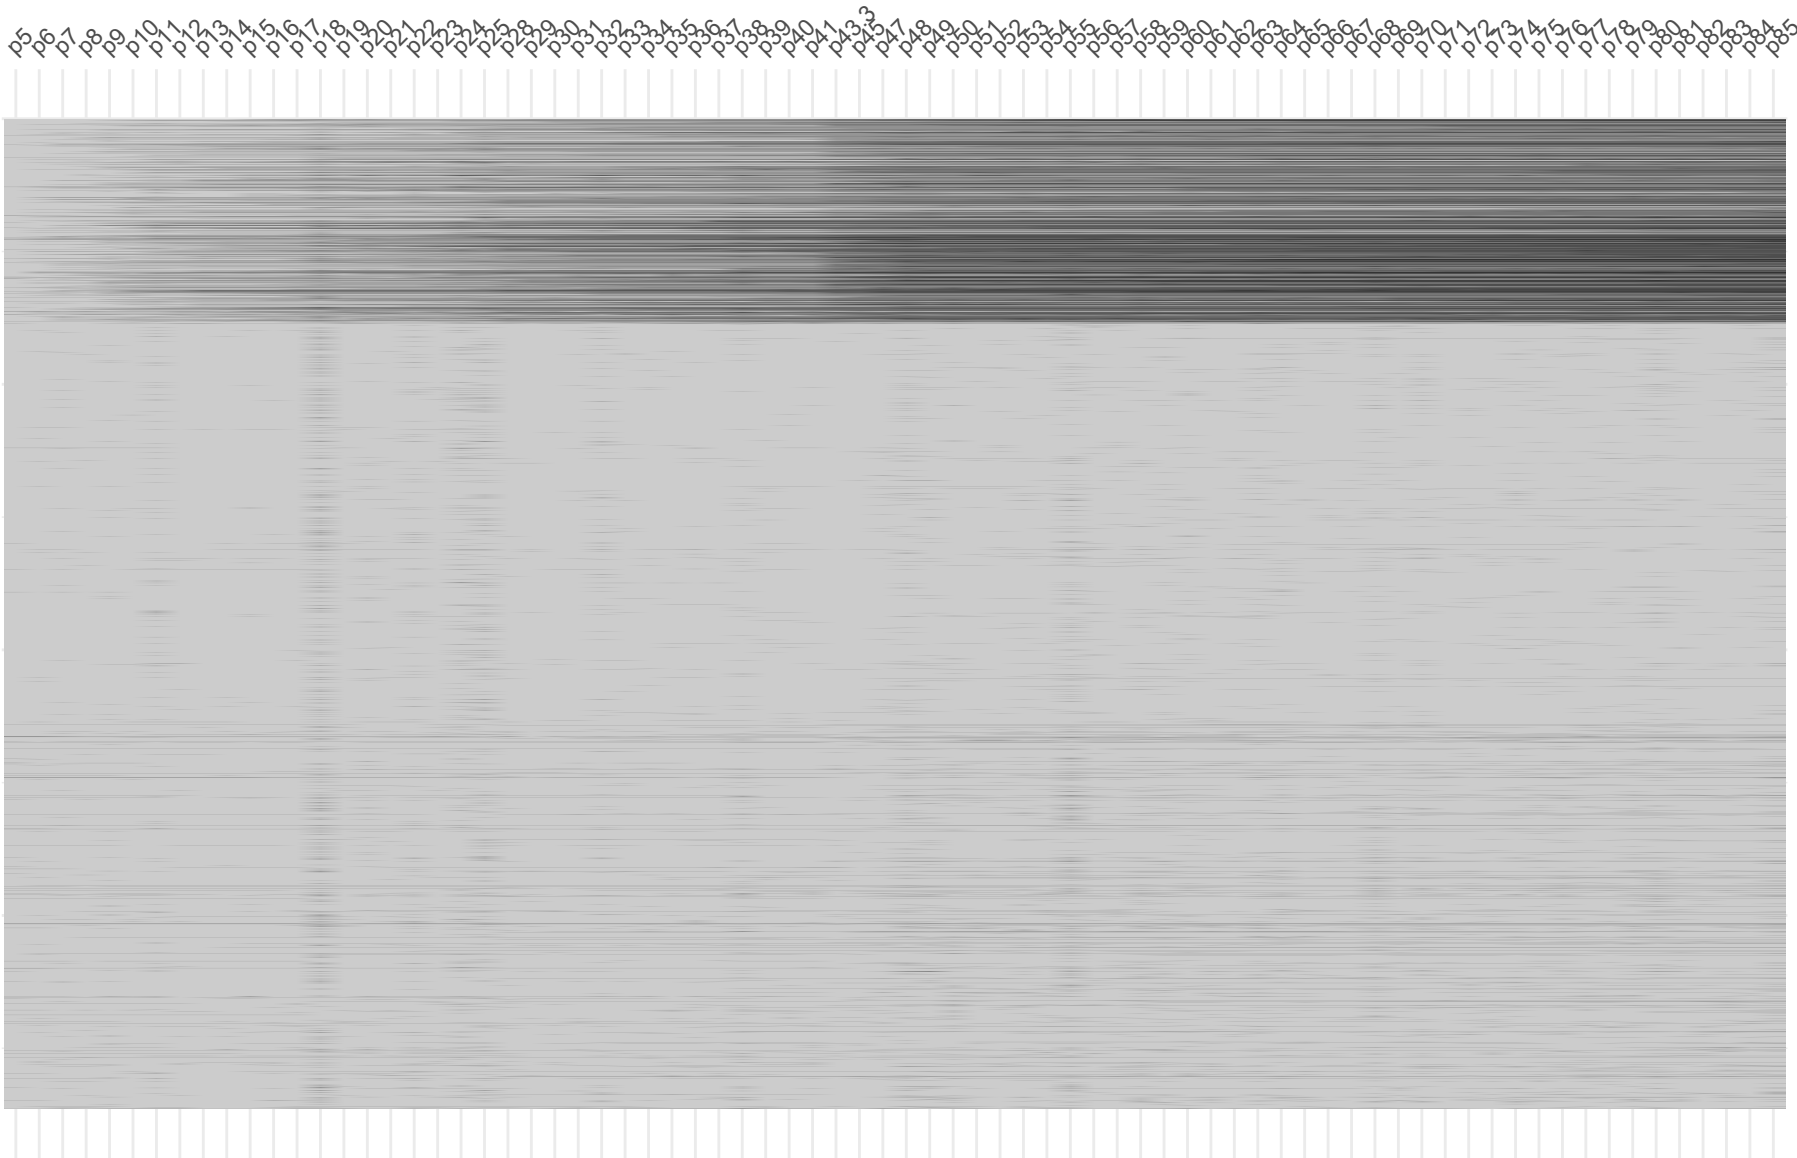

Supplement: supplementary_material [file attachment]
